## Seizures During Emergence from Anesthesia

PAUL A. MODICA, M.D.,\* RENE TEMPELHOFF, M.D.†

Postoperative seizures following neurosurgical procedures are well known.<sup>1</sup> However, seizure activity during emergence from general anesthesia is an unusual occurrence. We report the management of such a case that occurred in an epileptic patient who underwent a craniotomy for insertion of epidural electrode recording arrays used for the extraoperative localization of his seizure focus. Continuous end-tidal carbon dioxide (ETCO<sub>2</sub>) monitoring was valuable in the management of these seizures during emergence. In addition, this report also briefly describes the anesthetic protocol we developed at our institution to facilitate cortical EEG monitoring and intraoperative identification of the sensorimotor region during epilepsy surgery.

## CASE REPORT

A 25-yr-old man weighing 85 kg with an intractable complex partial seizure disorder poorly responsive to various anticonvulsant regimens was admitted to the neurosurgical service to undergo evaluation for possible surgical resection of his epileptogenic focus. At the time of admission he was having one to three seizures per week. His anticonvulsant regimen consisted of phenytoin 150 mg; carbamazepine 400 mg; valproic acid 750 mg; all three times a day, and clonazepam 7.5 mg twice a day. His past medical history and physical examination were otherwise unremarkable. All routine admission laboratory tests, including chest x-ray and electrocardiogram (ECG), were normal. Serum anticonvulsant levels were therapeutic.

On the second hospital day, he underwent a left frontotemporo-parietal craniotomy and a secondary small right temporal craniotomy with insertion of epidural electrode recording arrays to define precisely the location of his epileptogenic focus. The electrodes were placed on the extradural surface of the cerebral cortex to cover the left frontal-parietal region, left orbital-frontal lobe, as well as the left and right anterior temporal lobes. In this and all cases of epilepsy surgery performed at our institution, electrocorticographic recordings were then obtained intraoperatively from each electrode array for brief (1-5 min) periods only (fig. 1). These recordings are performed to both confirm satisfactory electrode contact with the epidural surface prior to surgical closure and to record seizure activity if it occurs intraoperatively during the direct cortical electrostimulation used to identify the sensorimotor

region.<sup>2</sup> After these recordings are completed, no additional cortical EEG monitoring is performed intraoperatively.

In order to facilitate cortical EEG monitoring and intraoperative identification of the patient's left hemispheric sensorimotor strip (including its relationship to the left frontal-parietal epidural electrodes), anesthetic management was based on a protocol developed at our institution.<sup>2</sup> In all cases, sedative-hypnotics are not administered preoperatively. With each patient breathing 100% oxygen (O<sub>2</sub>) by mask, anesthesia is induced with incremental doses of fentanyl, 50 µg, iv, and droperidol, 1.25 mg, iv. Loss of response to simple commands is achieved in most patients with 8-20 µg·kg<sup>-1</sup> of fentanyl and 0.08-0.2 mg·kg<sup>-1</sup> of droperidol. As unresponsiveness occurs, either vecuronium, 0.1 mg·kg<sup>-1</sup> iv, or atracurium, 0.5 mg·kg<sup>-1</sup> iv, is administered and the trachea is intubated following moderate hyperventilation *via* mask. Using controlled ventilation to maintain ETCO<sub>2</sub> at 24-28 mmHg, anesthesia is maintained with nitrous oxide (N<sub>2</sub>O) 60-70% in O<sub>2</sub>, isoflurane 0.2-0.3% ET, and a fentanyl infusion titrated to a stable depth of anesthesia as determined by changes in heart rate (HR) and mean arterial blood pressure (MAP). In most cases, 4-8 µg·kg<sup>-1</sup>·h<sup>-1</sup> of fentanyl is required, supplemented by intermittent 50 µg boluses when significant hemodynamic changes occur (*i.e.*, increases in HR and/or MAP > +15% of postinduction baseline).<sup>3</sup> Following intubation, neuromuscular blockade (determined by ulnar nerve stimulation) is allowed to dissipate spontaneously during craniotomy and dural exposure. Functional localization of the hand and face sensorimotor areas is then accomplished by recording the cortical sensory evoked responses associated with transcutaneous electrical stimulation of the contralateral median and facial nerves. The location of the sensorimotor region is also further confirmed by direct cortical electrostimulation to elicit movement of the contralateral hand and face.<sup>2</sup> When functional localization is completed, neuromuscular blockade is then reintroduced with an intermediate-acting muscle relaxant (*e.g.*, atracurium), and the fentanyl infusion is progressively decreased. Both the infusion and the isoflurane are discontinued during closure of the scalp flap.

In this case, preoperative medication included his usual anticonvulsant medications given orally. With the patient breathing 100% O<sub>2</sub> by mask, anesthesia was induced with fentanyl, 1000 µg, iv, and droperidol, 5 mg, iv. Tracheal intubation was facilitated with atracurium, 40 mg, iv. Maintenance of anesthesia included N<sub>2</sub>O 70%, O<sub>2</sub> 30%, isoflurane 0.2% ET, and fentanyl infusion. The patient was monitored with ECG, automatic blood pressure (BP) cuff, pulse oximetry, esophageal stethoscope with temperature probe, and mass spectrometry. An orogastric tube was inserted and the stomach was emptied. Controlled mechanical ventilation maintained ETCO<sub>2</sub> at 26 mmHg using a minute ventilation (MV) of 12.0 liters per minute (l·min<sup>-1</sup>). An arterial blood gas (ABG) drawn during ventilation using these settings revealed: pH 7.53; pCO<sub>2</sub> 28 mmHg; pO<sub>2</sub> 185 mmHg; HCO<sub>3</sub> 24.3 mEq·l<sup>-1</sup>. Throughout the first 9 h of anesthesia, good cardiovascular stability was maintained with a HR of 70-80 beats per min (bpm) and a BP of 100-120/60-70 mmHg. Following completion of functional localization and the intraoperative cortical EEG recordings, atracurium, 40 mg, iv, was administered. Seizure activity was absent on all the EEG recordings obtained (fig. 1).

During closure of the muscle flap, 30 min after isoflurane discontinuation, the ETCO<sub>2</sub> and HR were noted to have slowly risen to 38 mmHg and 110 bpm, respectively (fig. 2). Thiopental, 100 mg, iv, and

\* Instructor of Anesthesiology, Division of Neuroanesthesia.

† Assistant Professor of Anesthesiology and Neurological Surgery, Director of Neuroanesthesia.

Received from the Department of Anesthesiology, Division of Neuroanesthesia, Washington University School of Medicine, Box 8054, 660 S. Euclid Ave., St. Louis, Missouri 63110. Accepted for publication March 16, 1989.

Address reprint requests to Dr. Modica.

Key words: Anesthesia, emergence. Brain, seizures. Carbon dioxide, hypercapnia. Electroencephalography (EEG), cortical.

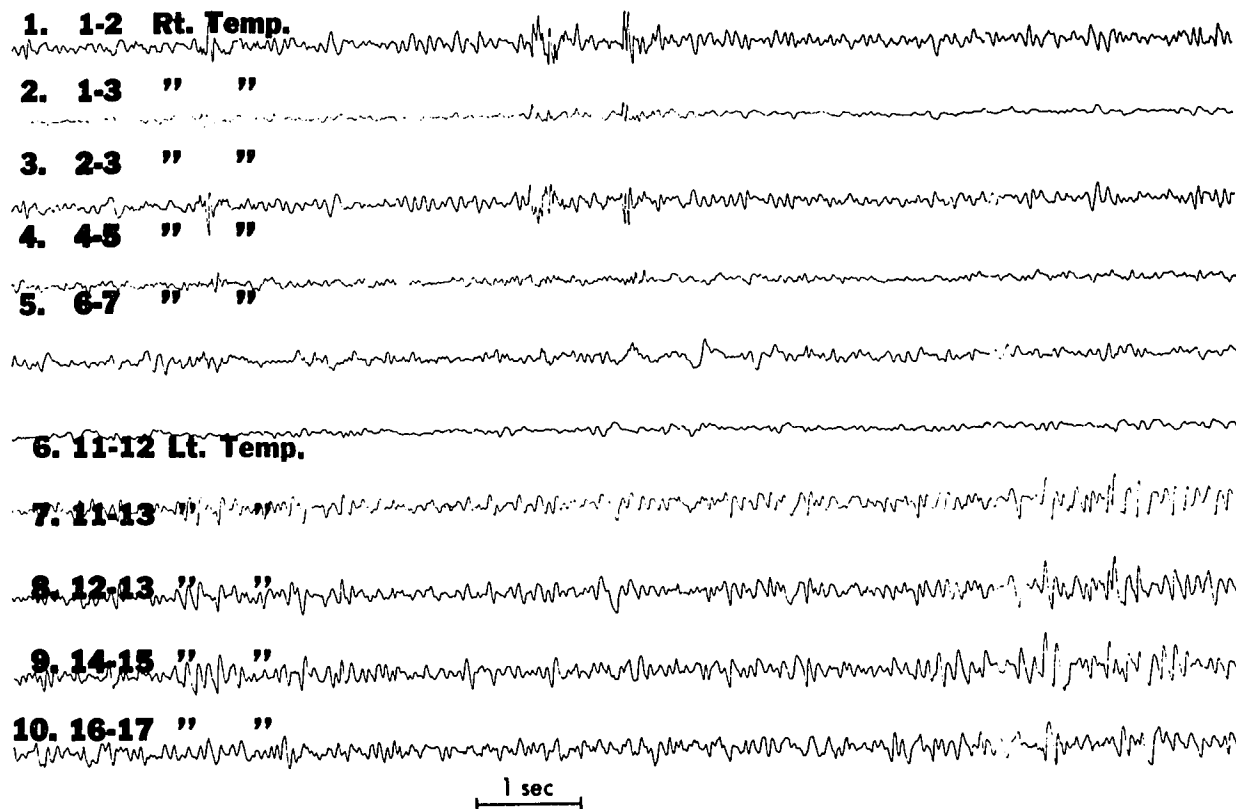

FIG. 1. Ten channel electrocorticographic recordings obtained intraoperatively from the right and left anterior temporal epidural electrodes during anesthesia with nitrous oxide 70%, fentanyl infusion,  $5 \mu\text{g} \cdot \text{kg} \cdot \text{hr}^{-1}$ , and isoflurane 0.2% end-tidal. Gain is  $7 \mu\text{V}$ . Each channel is recorded from an adjacent pair (i.e., 1-2, 1-3, etc) of electrodes. Interelectrode distance in each pair is 1 cm. No seizure activity is noted.

fentanyl, 350  $\mu\text{g}$ , iv, were given, but no change in HR or  $\text{ETCO}_2$  occurred. In addition, the temperature of the patient had also increased from  $35.6^\circ\text{C}$  to  $36.9^\circ\text{C}$  over this period. Consequently, after confirming the integrity of the breathing circuit and endotracheal tube, an ABG was drawn which demonstrated:  $\text{pH}$  7.46;  $\text{pCO}_2$  33 mmHg;  $\text{PO}_2$  168 mmHg;  $\text{HCO}_3^-$  24.7  $\text{mEq} \cdot \text{l}^{-1}$ , with a hemoglobin of 11.4  $\text{g} \cdot \text{dl}^{-1}$ .

Approximately 10 min later, the fentanyl infusion was stopped. Soon thereafter, the patient began to move in response to skin suturing. Thiopental, 100 mg, iv, and fentanyl, 500  $\mu\text{g}$ , iv, were given over the next 5 min. The total dose of fentanyl administered throughout the case was 6000  $\mu\text{g}$  ( $70.6 \mu\text{g} \cdot \text{kg}^{-1}$ ). The movement stopped, but the HR remained elevated at approximately 115 bpm. His temperature had increased to  $37.2^\circ\text{C}$ , but the  $\text{ETCO}_2$  remained stable at 40 mmHg.

After placement of the head dressing, the  $\text{N}_2\text{O}$  was turned off, 100%  $\text{O}_2$  administered, and a regular spontaneous breathing pattern was observed. The mass spectrometer indicated 0%  $\text{ET-isoflurane}$ . The patient began to exhibit spontaneous movements of all four extremities and appeared to be opening his eyes to command. During the next 5 min, the  $\text{ETCO}_2$  remained at 40 mmHg with an  $\text{O}_2$  saturation of 99%. The spirometer indicated a spontaneous MV of  $12 \text{ l} \cdot \text{min}^{-1}$  ( $800 \text{ cc} \times 15$ ). Ulnar nerve stimulation revealed sustained tetanus (100 Hz) and thus, an anticholinesterase was not administered. At this time, extubation was considered. However, during the following minute the  $\text{ETCO}_2$  and HR rapidly rose to 78 mmHg and 160 bpm, respectively (fig. 2). Thiopental, 50 mg, iv, was given and mechanical ventilation ( $\text{MV} = 19 \text{ l} \cdot \text{min}^{-1}$ ) was reinstituted with 100%  $\text{O}_2$ . No arrhythmias were noted. Despite this hyperventilation, the  $\text{ETCO}_2$  remained at approximately 80 mmHg during the following 5 min and the patient

continued to exhibit spontaneous movements, primarily of the upper extremities. Oxygen saturation was 99%. At this point, the patient's right arm went up in a flexed position at the elbow, consistent with his usual seizure pattern. BP was 130/70 mmHg. Thiopental, 250 mg, iv, was administered and the  $\text{ETCO}_2$  decreased to 40 mmHg in less than 1 min with cessation of the patient's peripheral motor activity (fig. 2). HR also fell to 110 bpm. Five minutes later, with the same ventilatory parameters, tonic activity reappeared gradually in the right arm. The  $\text{ETCO}_2$  and HR again rapidly increased to 70 mmHg and 130 bpm, respectively. A second dose of thiopental, 250 mg, iv, was given and the  $\text{ETCO}_2$  again rapidly decreased to 40 mmHg as the tonic activity ceased. An ABG was analyzed when the  $\text{ETCO}_2$  was 65 mmHg. The results were:  $\text{pH}$  7.15;  $\text{pCO}_2$  63 mmHg;  $\text{PO}_2$  466 mmHg;  $\text{HCO}_3^-$  23.3  $\text{mEq} \cdot \text{l}^{-1}$ . This confirmed the significance of the high  $\text{ETCO}_2$  observed. Again, within 5 min, the same sequence of events reoccurred; the  $\text{ETCO}_2$  reaching 65 mmHg, followed by prompt resolution with a third dose of thiopental, 250 mg, iv. Soon after, lorazepam, 4 mg, iv, was also administered, and within 5 min the patient exhibited less pronounced motor activity associated with a smaller increase in  $\text{ETCO}_2$  to 50 mmHg. However, 2-3 min later, both the increase in  $\text{ETCO}_2$  and the seizure activity resolved spontaneously. During the next 15 min, the controlled MV was slowly decreased to  $10 \text{ l} \cdot \text{min}^{-1}$  40%  $\text{O}_2$  administered, and the  $\text{ETCO}_2$  stabilized at 30 mmHg. An ABG revealed:  $\text{pH}$  7.48;  $\text{pCO}_2$  27 mmHg;  $\text{PO}_2$  186 mmHg;  $\text{HCO}_3^-$  20.6  $\text{mEq} \cdot \text{l}^{-1}$ . The patient's esophageal temperature was  $38.0^\circ\text{C}$  and his HR ranged from 100 to 110 bpm. He was then transferred to the neurological intensive care unit where mechanical ventilation was continued using a MV of  $10 \text{ l} \cdot \text{min}^{-1}$  with an inspired  $\text{O}_2$  of 40%.

An ABG drawn 1 h later showed:  $\text{pH}$  7.50;  $\text{pCO}_2$  27 mmHg;  $\text{PO}_2$  175

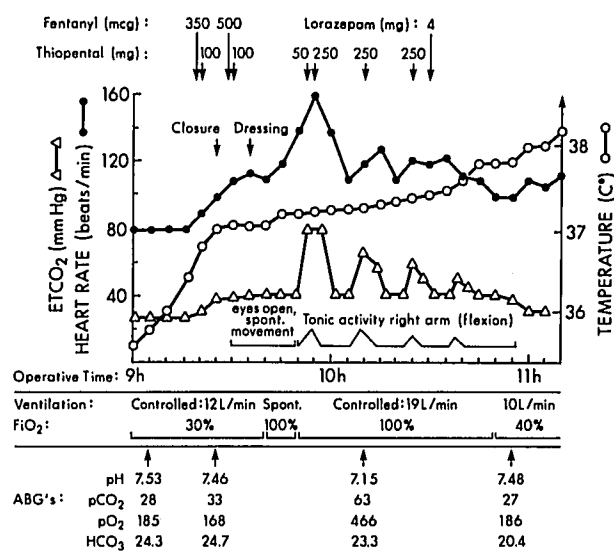

FIG. 2. Chronologic graph of end-tidal CO<sub>2</sub> (ET-CO<sub>2</sub>), heart rate, esophageal temperature, minute ventilation with percent (%) inspired oxygen (FI<sub>O<sub>2</sub></sub>), arterial blood gas results, drugs administered, and neurological examination.

mmHg; HCO<sub>3</sub> 23.4 mEq · l<sup>-1</sup>. His oral temperature was 38.8° C and HR was approximately 100 bpm. Serum electrolytes, including glucose, calcium, and magnesium, were all within normal limits. The patient was weaned from mechanical ventilation and the trachea was extubated 8 h postoperatively. No further seizures occurred that evening and no new neurological deficits were found. A room air ABG showed: pH 7.44; pCO<sub>2</sub> 38 mmHg; pO<sub>2</sub> 89; HCO<sub>3</sub> 26.5 mEq · l<sup>-1</sup>. His temperature had decreased to 38.0° C. The remainder of his postoperative course was uneventful. In order to facilitate extraoperative electrocorticography, his anticonvulsant medications were reduced by half by discontinuing carbamazepine and clonazepam. Only phenytoin and valproic acid were resumed using the same dosages and administration schedules prescribed preoperatively. Serum anticonvulsant levels were not re-evaluated.

At our institution the epileptogenic focus is localized extraoperatively using the electrocorticographic recordings obtained from the indwelling epidural electrode arrays. In addition, the speech and/or sensorimotor areas and their relationship to the seizure focus are identified in the awake patient by stimulating and recording epidurally via the electrode arrays.<sup>2</sup> In a specially designed room, both the patient's behavior and the electrocorticogram are recorded continuously, displayed side-by-side on the split screen of a television monitor. This is necessary to determine accurately which cortical area shows the first sign of seizure activity in the moments preceding the onset of a clinical convulsion, essential information for localizing the focus. In the case presented, our patient had three clinical seizures extraoperatively that were preceded by sudden suppression of the interictal left temporal lobe recordings. The suppressed record rapidly progressed to a high voltage repetitive seizure discharge that spread first to the left frontal lobe, then to the right temporal lobe, and finally to the left frontal-parietal region.

In view of the above electrocorticographic findings, a left anterior temporal lobectomy was performed 3 days after the first craniotomy. Maintenance of anesthesia again consisted of the same agents used in the first craniotomy plus muscle relaxation provided by pancuronium. His anesthetic course during the 10-h secondary craniotomy was uneventful, including both emergence and the immediate postoperative period.

## DISCUSSION

During epileptic seizures, a number of potentially serious systemic sequelae occur. Acutely, seizures can produce hypertension, tachycardia, cardiac arrhythmias, hyperthermia, respiratory and lactic acidosis.<sup>4</sup> Some of these systemic complications (*e.g.*, tachycardia, hypercarbia, increasing body temperature) were evident at the time of our patient's seizures during emergence. Not surprisingly, the deleterious effects of seizures result primarily from rapid increases in brain and muscle O<sub>2</sub> demand combined with the impairment of ventilation produced by tonic spasm.<sup>4</sup> This can lead to hypoxemia and severe systemic acidosis if seizure activity becomes prolonged or repetitive. Ultimately, irreversible neurological damage occurs as the brain's limited capacity to adjust its metabolism to generate increased energy fails.<sup>5</sup>

As illustrated in this report, in order to prevent residual neurological abnormalities, oxygenation accompanied by vigorous efforts to control the abnormal discharge are the most important parts of the treatment of repetitive seizures.<sup>5</sup> Throughout our patient's seizures his arterial pO<sub>2</sub> was well maintained and he recovered uneventfully. However, early during emergence the patient's condition appeared to satisfy the usual criteria for extubation, as it was difficult to distinguish his early seizure movements from those normally encountered during emergence. This is not surprising because some patients with partial epilepsy do not manifest large amounts of motor activity during their seizures. Fortunately for our patient, a period of compromised oxygenation was avoided, as the data provided by continuous ET-CO<sub>2</sub> monitoring prevented an untimely extubation by revealing an acute increase in CO<sub>2</sub> production before motor seizure activity was clearly evident. His seizures were only briefly controlled by bolus doses of thiopental, a consequence of its rapid redistribution from the brain to lean tissue.<sup>6</sup> Continuing suppression of seizure activity was finally achieved with lorazepam as it does not require repetitive injections after initial control is attained.<sup>7</sup>

There are numerous anesthetic and nonanesthetic causes of perioperative seizures, some of which could have been involved in this case. Convulsions due to abnormalities in various serum electrolytes are well known<sup>1</sup>; however, all of our patient's postoperative electrolyte determinations were normal. Cerebral edema of multiple origins, such as fluid overload or after tumor resection,<sup>1</sup> is a common cause of perioperative seizures. It could have been a factor during this craniotomy, especially in view of the prolonged cortical stimulation and insertion of the epidural recording electrodes, a foreign body. However, the brain appeared well relaxed clinically during closure of the craniotomy. Febrile convulsions, including those due to malignant hyperthermia, have been reported dur-

ing general anesthesia,<sup>1</sup> but usually at temperatures higher than the 37–38° C level found in this case when the seizures occurred. Furthermore, the mild hyperthermia observed in our patient was most likely a systemic effect (rather than a cause) of his seizures.

In unmedicated epileptic<sup>8</sup> and nonepileptic<sup>9</sup> patients, 70% N<sub>2</sub>O produced fast (15–35 Hz) EEG activity. The epileptics exhibited restlessness and hallucinations, whereas in the nonepileptics the fast EEG activity persisted for up to 1 h following N<sub>2</sub>O discontinuation. Withdrawal convulsions have occurred in mice after removal from a 15-min exposure to 0.5–1.6 atm N<sub>2</sub>O,<sup>10</sup> while humans exposed to hyperbaric (1.5 atm) N<sub>2</sub>O exhibited excitatory phenomena during recovery.<sup>11</sup> Despite this evidence, it is doubtful that the seizures we observed during emergence were caused by N<sub>2</sub>O withdrawal, as this has never been reported in humans, including those monitored with an EEG. In addition, the intermittent (albeit brief) intraoperative cortical EEG recordings did not demonstrate seizure activity during N<sub>2</sub>O administration.

There have been several reports, all without EEG monitoring, of seizure-like motor behavior in nonepileptic patients during anesthetic induction with low (100–200 µg)<sup>12</sup> to moderate (2250–2500 µg)<sup>13</sup> doses of fentanyl. Although we did not observe any EEG epileptiform activity intraoperatively, the use of concomitant neuromuscular blockade may have prevented clinical seizure movements in our patient during anesthetic induction with fentanyl, 1000 µg, iv. Interestingly, in all previous studies performed with scalp EEG monitoring, no evidence of cortical seizure activity was demonstrated following either low (500 µg)<sup>14</sup> or high (150 µg/kg)<sup>15</sup> doses of fentanyl, including cases where seizure-like movements were observed. This suggests that these movements represent either myoclonus or exaggerated fentanyl-induced muscle rigidity.<sup>14,15</sup> However, one could also contend that these convulsive-like movements are instead due to fentanyl-induced subcortical seizure activity, which would not be detected with standard surface EEG electrodes. Ketamine-induced subcortical seizures have been demonstrated with depth electrode EEG in epileptics in whom simultaneous cortical recordings were unremarkable.<sup>8</sup> Furthermore, fentanyl-induced seizures in rats are accompanied by metabolic activation of the subcortical limbic system (hippocampus, amygdala, etc.).<sup>16</sup> The hippocampus is located in the medial temporal lobe and our patient had a temporal lobe seizure focus. During the 10 h of anesthesia, he received 70.6 µg · kg<sup>-1</sup> of fentanyl, including 800 µg in the last half hour. This may have produced a late secondary peak in fentanyl plasma concentration,<sup>17</sup> which theoretically could have activated his epileptogenic focus subcortically and led to the seizures observed during emergence. If true, this would be a rare occurrence, as fentanyl-induced EEG or clinical seizure

activity has never been reported either in epileptic patients or during emergence from high-dose fentanyl anesthesia.

Retrospectively, after considering the above possibilities, we believe that the patient's poorly controlled complex partial seizure disorder itself was the most likely etiology of his seizures during anesthetic emergence. However, other interacting factors were also potentially involved. Although his anticonvulsant medications have half-lives in the 10–20-h range,<sup>18</sup> he had not received any of these drugs for over 12 h and his stomach was emptied soon after his morning doses. Thus, we suspect some contribution from declining anticonvulsant plasma levels in the genesis of his seizures during emergence. In addition, a degree of cortical irritation due to prolonged cortical stimulation and insertion of epidural electrodes may have also contributed to the observed seizures. Finally, his seizures occurred during emergence, a period associated with light levels of anesthesia, a known method of eliciting convulsive tendencies.<sup>19</sup>

Our anesthetic protocol for functional localization and cortical EEG monitoring was developed for specific reasons. By omitting sedative-hypnotic drugs (including premedicants) and high concentrations of volatile anesthetic agents from anesthesia, we found during direct cortical electrostimulation that the threshold for producing movement of the contralateral hand/face was lower and also more reproducible in a small range of stimulus intensities from patient to patient. In addition, the extent of electrically excitable cortex is also much less constricted with our neuroleptanesthesia-based technique. Furthermore, by excluding drugs known to increase (*e.g.*, diazepam) or decrease (*e.g.*, methohexital) the seizure threshold in epileptics, we feel that the opportunity to obtain reliable recordings of seizures, both intraoperatively (if they occur) and especially extraoperatively, is greatly enhanced. Based on the available evidence,<sup>20</sup> it appears that following clinically relevant doses of atracurium, the plasma levels of laudanosine formed are of little (if any) concern during surgery for epilepsy in patients with normal renal and hepatic function.

In summary, a case of seizures that occurred during anesthetic emergence is presented. Continuous ET<sub>CO</sub><sub>2</sub> monitoring was valuable in helping to prevent an untimely extubation before motor seizure activity was clearly evident. Thus, oxygenation was well maintained and the seizures were controlled with thiopental and lorazepam, resulting in a good postoperative neurological outcome. The most likely etiology of these seizures was the patient's own poorly controlled complex partial seizure disorder itself, although other interacting factors were also potentially involved.

## REFERENCES

1. Manners JM, Wills A: Post-operative convulsions: A review based on a case report. *Anaesthesia* 26:66–77, 1971

2. Goldring S, Gregorie EM, Tempelhoff R: Surgery of epilepsy, Operative Surgery. Edited by Lansey S. London, Butterworth, 1989 (in press)
3. Tempelhoff R, Modica PA, Spitznagel E: Increased fentanyl requirements in patients receiving long-term anticonvulsant therapy (abstract). *ANESTHESIOLOGY* 69:A594, 1989
4. Wasterlain CG: Mortality and morbidity from serial seizures. *Epilepsia* 15:155-176, 1974
5. Duffy TE, Howse DC, Plum F: Cerebral energy metabolism during experimental status epilepticus. *J Neurochem* 24:925-934, 1975
6. Cloyd JC, Wright BD, Perrier D: Pharmacokinetic properties of thiopental in two patients treated for uncontrollable seizures. *Epilepsia* 20:313-318, 1979
7. Walker JE, Homan RW, Vasko MR, Crawford IL, Bell RD, Tasker WG: Lorazepam in status epilepticus. *Ann Neurol* 6:207-213, 1979
8. Ferrer-Allado T, Brechner VL, Dymond A, Cozen H, Crandall P: Ketamine-induced electroconvulsive phenomena in the human limbic and thalamic regions. *ANESTHESIOLOGY* 38:333-344, 1973
9. Yamamura T, Fukuda M, Takeya H, Goto T, Furukawa K: Fast oscillatory EEG activity induced by analgesic concentrations of nitrous oxide in man. *Anesth Analg* 60:283-288, 1981
10. Harper MH, Winter PM, Johnson BH, Koblin DD, Eger EI II: Withdrawal convulsions in mice following nitrous oxide. *Anesth Analg* 59:19-21, 1979
11. Hornbein TF, Eger EI II, Winter PM, Smith G, Weststone D, Smith KH: The minimum alveolar concentration of nitrous oxide in man. *Anesth Analg* 61:553-556, 1982
12. Safwat AM, Daniel D: Grand mal seizure after fentanyl administration (letter). *ANESTHESIOLOGY* 59:78, 1983
13. Rao TLK, Mummaneni N, El-Etr AA: Convulsions: An unusual response to intravenous fentanyl administration. *Anesth Analg* 61:1020-1021, 1982
14. Scott JC, Sarnquist FH: Seizure-like movements during a fentanyl infusion with absence of seizure activity in a simultaneous EEG recording. *ANESTHESIOLOGY* 62:812-814, 1985
15. Murkin JM, Moldenhauer CC, Hug CC Jr, Epstein CM: Absence of seizures during induction of anesthesia with high-dose fentanyl. *Anesth Analg* 63:489-494, 1984
16. Tommasino C, Maekawa Y, Shapiro HM, Keifer-Goodman J, Kohlenberger RW: Fentanyl-induced seizures activate subcortical brain metabolism. *ANESTHESIOLOGY* 60:283-290, 1984
17. McClain DA, Hug CC Jr: Intravenous fentanyl kinetics. *Clin Pharmacol Ther* 28:106-114, 1980
18. Rall TW, Schleifer LS: Drugs effective in the therapy of the epilepsies, *The Pharmacological Basis of Therapeutics*. Edited by Gilman AG, Goodman LS, Rall TW, Murad F. New York, Macmillan Publishing Co., 1985, pp 446-472
19. Lebowitz MH, Blitt CD, Dillon JB: Enflurane-induced central nervous system excitation and its relation to carbon dioxide tension. *Anesth Analg* 51:355-363, 1972
20. Ingram MD, Sciallasi RJ, Cook DR, Stiller L, Bennett MH: Cardiovascular and electroencephalographic effects of laudanosine in "nephrectomized" cats. *Br J Anaesth* 58(suppl):14S-18S, 1986

Anesthesiology  
71:300-303, 1989

## Coronary Angioplasty Following Acute Perioperative Myocardial Infarction

STEVEN ROTH, M.D.,\* JOANNE SHAY, M.D.,† K. G. CHUA, M.D.‡

In the early hours following an acute myocardial infarction (AMI), coronary angioplasty and/or thrombolytic therapy may be indicated in an attempt to restore blood flow to ischemic myocardium.<sup>1</sup> Such therapy is increasingly available to hospitalized patients. Unfortunately patients who suffer an intraoperative AMI are often deprived of this form of treatment due to difficulties in detection of the infarction and problems of interdisciplinary communication. We describe a case in which intraoperative electro- and echocardiographic changes suggested

AMI during noncardiac surgery, and balloon angioplasty was carried out immediately postoperatively with a successful outcome. Our purpose in presenting this case is to alert anesthesiologists to the logistics involved in carrying out angioplasty postinfarction and to summarize the importance and benefits of invasive therapy for an acute intraoperative myocardial infarction.

### CASE REPORT

A 47-yr-old man with diabetes mellitus, hypertension, and a long history of smoking underwent wide excision of the left anterior knee structure and gastrocnemius flap reconstruction for a poorly differentiated sarcoma of the patella. Medications included propranolol 40 mg twice a day, chlorpromamide 500 mg daily, and enalapril 5 mg daily. He had occasional chest pain at rest. He weighed 92 kg, his lungs were clear, and no heart murmurs or S3 were audible. Arterial blood pressures of 170/90-115 were recorded preoperatively. The ECG showed inverted T waves in lead III and left ventricular hypertrophy by voltage criteria.

The morning of surgery the patient received 10 mg diazepam, 40 mg propranolol, and 5 mg enalapril orally. Preoperative arterial blood pressure was 180/105 mmHg with a heart rate of 70 bpm. The an-

\* Assistant Professor, Department of Anesthesia and Critical Care.

† Resident, Department of Anesthesia and Critical Care.

‡ Associate Professor, Department of Medicine (Cardiology).

Received from the Departments of Anesthesia and Critical Care and Medicine (Cardiology), University of Chicago Medical Center, 5841 South Maryland Avenue, Box 428, Chicago, Illinois 60637. Accepted for publication March 16, 1989.

Address reprint requests to Dr. Roth.

Key words: Complications: myocardial ischemia. Monitoring: two dimensional transesophageal echocardiography.
